1 Article

2 **Biochemical and Biophysical Characterization of the dsDNA**  
3 **packaging motor from the *Lactococcus lactis* bacteriophage**  
4 **ascphi28**

5 Emilio Reyes-Aldrete<sup>1,†</sup>, Erik A. Dill<sup>1,†</sup>, Cecile Bussetta<sup>1</sup>, Michal R. Szymanski<sup>1,2</sup>, Geoffrey  
6 Diemer<sup>1</sup>, Priyank Maindola<sup>1</sup>, Mark A. White<sup>1,3</sup>, Wlodzimierz M. Bujalowski<sup>1,3</sup>, Kyung H. Choi<sup>1,3</sup>  
7 and Marc C. Morais<sup>1,3\*</sup>

8 <sup>1</sup> Department of Biochemistry and Molecular Biology, The University of Texas Medical Branch at Galveston,  
9 Galveston Texas, 77555 USA

10 <sup>2</sup> Currently at Intercollegiate Faculty of Biotechnology, University of Gdansk and Medical University of  
11 Gdansk

12 <sup>3</sup> Sealy Center for Structural Biology, The University of Texas Medical Branch at Galveston, Galveston  
13 Texas, 77555 USA

14 \* Correspondence: [mcmorais@utmb.edu](mailto:mcmorais@utmb.edu); Tel.: +1-409-747-1401

15 † These authors contributed equally to this work.

16

17 Received: date; Accepted: date; Published: date

18

19 **Abstract:** Double-stranded DNA viruses package their genomes into pre-assembled protein  
20 procapsids. This process is driven by macromolecular motors that transiently assemble at a unique  
21 vertex of the procapsid and utilize homomeric ring ATPases to couple genome encapsidation to ATP  
22 hydrolysis. Here we describe biochemical and biophysical characterization of the packaging  
23 ATPase from *Lactococcus lactis* phage ascφ28. Size-exclusion chromatography, analytical  
24 ultracentrifugation, small angle x-ray scattering, and negative stain TEM indicate that the ~45 kDa  
25 protein formed a 443 kDa cylindrical assembly with a maximum dimension of ~155 Å and radius of  
26 gyration of ~54 Å. Together with the dimensions of the crystallographic asymmetric unit from  
27 preliminary X-ray diffraction experiments, these results indicate that gp11 forms a decameric D5-  
28 symmetric complex consisting of two pentameric rings related by 2-fold symmetry. Additional  
29 kinetic analysis shows that recombinantly expressed gp11 has ATPase activity comparable to that of  
30 functional ATPase rings assembled on procapsids in other genome packaging systems. Hence, gp11  
31 forms rings in solution that likely reflect the fully assembled ATPases in active virus-bound motor  
32 complexes. Whereas ATPase functionality in other dsDNA phage packaging systems requires  
33 assembly on viral capsids, the ability to form functional rings in solution imparts gp11 with  
34 significant advantages for high resolution structural studies and rigorous biophysical/biochemical  
35 analysis.

36 **Keywords:** bacteriophage, dsDNA virus, genome packaging, molecular motor, ascphi28, phi29,  
37 ASCE superfamily, P-loop NTPase, phage terminase, encapsidation protein, ATPase

38

---

39 1. Introduction

40 Tailed bacteriophages have historically served as model systems for mechanistic investigations  
41 of powerful molecular motors that use ATP hydrolysis to translocate double-stranded DNA into pre-  
42 formed virus protein capsids [1-4]. Most large ssDNA viruses and dsDNA viruses—such as herpes  
43 virus, pox virus, adenovirus, and all the tailed dsDNA bacteriophages—assemble an empty virus

44 shell, and then actively translocate DNA into this procapsid. There are considerable entropic and  
45 enthalpic costs associated with compacting DNA to near-crystalline densities inside virus shells  
46 [3,5,6]. DNA must be bent significantly and repeatedly, and it must be condensed without any knots,  
47 tangles, or other topological anomalies that would prevent genome ejection during subsequent  
48 infection events. To package DNA efficiently, viruses code for homomeric ring ASCE ATPases that  
49 tightly couple ATP hydrolysis and DNA translocation [1,3,4,7,8]. This ancient ATPase superfamily is  
50 ubiquitous across all three domains of life, and its members are typically involved in polymer  
51 manipulation tasks (e.g. protein degradation, chromosome segregation, DNA recombination, DNA  
52 strand separation, and conjugation), or in molecular segregation such as proton movement by the F1-  
53 ATP synthase [9-12]. Thus, understanding the mechanistic principles underlying viral DNA  
54 packaging will also illuminate the mechano-chemistry of a broad class of molecular motors  
55 responsible for basic macromolecular partitioning processes. Within the ASCE NTPase superfamily,  
56 virally encoded dsDNA packaging motors are especially powerful, capable of producing forces in  
57 excess of 50 pN [13,14]. Hence the virally encoded ATPases that drive dsDNA encapsidation  
58 provide a unique window into how maximum mechanical force can be extracted from chemical  
59 hydrolysis of ATP. In addition to serving as model systems to investigate the biophysical challenges  
60 associated with DNA condensation and ATPase mechanochemistry, these motors are attractive  
61 targets for therapeutics that inhibit dsDNA virus proliferation since there is no direct counterpart in  
62 eukaryotic cells [15].

63 Given the importance of viral dsDNA packaging motors in both applied and basic biomedical  
64 research, considerable effort has been exerted to understand the molecular basis of genome  
65 packaging. As a result, several different bacteriophage dsDNA packaging systems have been  
66 developed to experimentally interrogate the encapsidation process, each of which have relative  
67 advantages and disadvantages [1-3]. Common to all systems, the packaging motors include a  
68 portal/connector protein that provides the “portal” for DNA entry and exit, and an ATPase that  
69 powers DNA translocation through the portal and into the capsid. While the packaging motors in  
70 each system essentially perform the same task, use similar molecular machinery, and likely share  
71 common underlying mechano-chemistry, there are important differences which must be considered.  
72 To provide a simple conceptual framework for categorizing packaging motors, we distinguish  
73 between two different types: 1) those that must cut their DNA at the beginning and end of packaging  
74 to encapsidate concatenated genomes; and 2) those that simply package a fixed unit-length genome.

75 Two of the most well-known examples of genome-cutting packaging systems are bacteriophages  
76 lambda and T4 [1,2]. In these phages, a concatenated multiple-copy genome is transcribed, and thus  
77 the motor is not simply a translocating machine. It first must find the genome start site on the  
78 concatenated multi-genome, make a cut in the genome, and only then begin packaging the DNA into  
79 the capsid. Further, as the capsid fills with DNA, the motor must somehow sense that packaging is  
80 complete and cut the genome again such that the motor-DNA complex can detach from the filled  
81 head and re-attach to another empty procapsid. In bacteriophage lambda a specific DNA sequence  
82 known as a “cos” site is recognized as the cut site at the beginning and end of packaging.  
83 Bacteriophage T4 uses a “headful” mechanism, wherein the phage somehow recognizes that slightly  
84 more than one genome-length of DNA has been packaged, thus filling the procapsid.

85 To accomplish these additional tasks, genome-cutting motors require additional protein  
86 components to identify the genome and locate the appropriate start site for packaging, as well as a  
87 functional nuclease to cut the genome at the beginning and the end of packaging. Hence, genome-  
88 cutting phages also code for a fully functional RNaseH-like nuclease that is fused to the ATPase as a  
89 C-terminal domain and which cuts DNA at the beginning and end of packaging. Due to this  
90 nucleolytic function, these ATPases are often referred to as large terminases. Genome-cutting systems  
91 also code for a so-called small terminase protein that is likely involved in genome recognition. Despite  
92 adopting the “terminase” nomenclature, no enzymatic functions are associated with the small  
93 terminase. Neither the exact function of the small terminase, nor how it is incorporated in the motor  
94 complex, is well understood.

95 Fixed length packaging systems are somewhat simpler. In these types of phages, single unit-  
96 length genomes are produced rather than the concatenated multi-genomes utilized by genome-  
97 cutting phages. Because the polymerases in these phages use a protein primer to initiate replication,  
98 the genomes of fixed length phages have a protein covalently attached to the 5'-end of each strand of  
99 genomic DNA. The ATPase assembles at the portal vertex, engages its DNA substrate by recognizing  
100 and binding the terminal protein at a genomic 5'-end, packages until the entire nucleic acid is  
101 encapsulated, and then detaches, possibly to assemble at the portal vertex of another empty capsid.  
102 The most thoroughly characterized fixed length packaging system is the bacteriophage  $\phi 29$  system.  
103 Since  $\phi 29$  packages a unit length genome, its packaging motor is accordingly simpler. There is no  
104 need for a nuclease function to cut the DNA, and thus the  $\phi 29$  ATPase lacks a fully functional  
105 nuclease domain and is only ~60% the size of ATPases/large terminases in genome-cutting packaging  
106 systems [16]. Similarly, the portal protein is only ~60% of the size of portals in cutting systems [17],  
107 possibly because it does not have or need any structural components to sense that the capsid is full  
108 and/or transmit this signal to the rest of the motor. Further, the 5'-terminal protein provides a unique  
109 identifying feature of genomic DNA, and thus these phages do not use a small terminase for genome  
110 recognition. Thus,  $\phi 29$  is in some sense a stripped-down version of the genome-cutting packaging  
111 motors. However,  $\phi 29$  is by no means simple; structural and single molecule results indicate that the  
112  $\phi 29$  packaging motor operates in a highly coordinated manner to regulate the activity of its subunits  
113 and to efficiently generate force to translocate DNA [18-21]. Additionally,  $\phi 29$  is unusual in that it  
114 requires a virally encoded structural RNA molecule (pRNA) that acts as a scaffold for assembly of a  
115 functional ATPase ring, and which is not present in headful packaging systems [17,22-25]. Thus,  
116 neither the genome-cutting nor fixed genome-length systems represent the universal essential  
117 minimum necessary for operation of a packaging motor.

118 An additional complicating factor in all current model systems is that in both genome-cutting  
119 and unit-length packaging motors, the ATPases form functional rings only by virtue of assembling  
120 on the capsid (as in T4) [26], on the small terminase (as in lambda) [1,27], or on the pRNA (as in  $\phi 29$ )  
121 [17,25]. As a result, rigorous biophysical studies to interrogate inter-subunit interactions are  
122 challenging, and structural information regarding the functional ATPase assembly has thus far been  
123 limited to fitting X-ray structures of various motor components into low resolution cryoEM maps of  
124 motor complexes assembled on procapsids [26,28]. Understanding the molecular basis of subunit  
125 coordination would thus be facilitated by the availability of stable ATPase ring assemblies that can  
126 be interrogated biophysically and via atomic resolution structural information to learn how the  
127 ATPase subunits interact to efficiently translocate DNA.

128 It would thus be useful to develop a packaging system that is like  $\phi 29$  in that it has fewer,  
129 smaller, and simpler motor components, but which does not need a pRNA to assemble a functional  
130 ATPase ring. Such a motor would reflect the most experimentally useful aspects of both types of  
131 systems and likely represent the bare minimum necessary to translocate dsDNA. Toward this end,  
132 we have characterized the DNA packaging ATPase from the *Lactococcus lactis* phage ascc $\phi 28$  [29].  
133 Like  $\phi 29$ , ascc $\phi 28$  packages a unit-length genome that has a terminal protein covalently attached to  
134 each 5'-end of its genomic DNA. Hence, ascc $\phi 28$  also codes for smaller, simpler versions of the portal  
135 protein and the ATPase, similar to  $\phi 29$ . However, there is no evidence for a pRNA in its genome  
136 sequence. Since a primary function of the pRNA in  $\phi 29$  is to act as a scaffold for assembly of a  
137 functional ATPase ring [3,17,23,28], we hypothesized that the ATPase from ascc $\phi 28$  might have  
138 evolved to form functional rings on its own. If so, the ATPase from  $\phi 28$  would be an excellent model  
139 for rigorous biophysical and high-resolution structural analysis of functional ATPase ring motors  
140 that drive viral dsDNA genome packaging.

141 Indeed, using a combination of size-exclusion chromatography (SEC), analytical ultra-  
142 centrifugation (AUC), small X-ray scattering (SAXS), negative-stain transmission electron  
143 microscopy (TEM), and preliminary X-ray crystallographic diffraction, we show that recombinantly  
144 expressed gene product 11 (gp11) from ascc $\phi 28$  is a highly soluble and stable decameric assembly  
145 consisting of two pentameric rings related by D5 point group symmetry. Additional kinetic

146 characterization of NTPase binding and hydrolysis shows that the assembly binds and hydrolyzes  
147 ATP similarly to the ATPases in  $\phi 29$  and other phages, but only once the ATPases in these other  
148 systems have assembled functional rings on the procapsid. These results suggest that the pentameric  
149 rings in the D5 decamer reflect the biological assembly of the gp11 packaging ATPase on ascc $\phi 28$   
150 procapsids. Hence, the dsDNA packaging motor gp11 from bacteriophage ascc $\phi 28$  provides a unique  
151 opportunity to examine a phage dsDNA-packaging motor apart from other packaging components.  
152 Studying an isolated, functional ATPase ring motor will facilitate rigorous biophysical analysis, more  
153 straightforward kinetic analysis, and high-resolution structure determination, expediting a  
154 comprehensive understanding of viral dsDNA packaging motors and the mechano-chemistry  
155 common to the larger superfamily of ASCE ATPases to which they belong.

## 156 2. Materials and Methods

### 157 2.1 Cloning

158 A BLAST search identified phage ascc $\phi 28$  gene product 11 (gp11) as orthologous to the  
159 bacteriophage  $\phi 29$  packaging ATPase, with 45% sequence similarity and 28% amino acid identity  
160 [30]. A recombinant, codon-optimized gene for gp11 was synthesized by DNA 2.0 (now ATUM)  
161 based on the published sequence of phage ascc $\phi 28$  (GenBank ascension number EU438902) [29].  
162 The synthesized gene was inserted into a pET-30a(+) vector (Novagen) with kanamycin resistance  
163 using NdeI and XhoI restriction sites, resulting in a final construct with an additional C-terminal, -  
164 LEHHHHHH tag to facilitate purification by metal-affinity chromatography [31]. DNA sequencing  
165 confirmed that the final construct matched the published amino acid sequence of ascc $\phi 28$  gp11.

### 166 2.2 Protein expression and purification

167 *E. coli* cells transformed with the synthetic construct were grown in Luria-Bertani medium with  
168 30  $\mu\text{g/ml}$  of kanamycin at 37°C until optical density at 600 nm reached  $\sim 0.6$  (1 cm path). The BL21  
169 (DE3) strain of *E. coli* (Novagen) was predominantly used, but other strains also show good  
170 expression. Maximum yield of soluble protein was obtained by induction with isopropyl- $\beta$ -D-1-  
171 thiogalactopyranoside (IPTG) at a final concentration of 0.1 mM and expression overnight at 18°C.  
172 Cells were harvested by centrifugation at 4000 g for 20 min at 4°C. Cell pellets were then either stored  
173 at -20°C or immediately resuspended in a lysis/extraction buffer containing 50 mM  $\text{Na}_2\text{HPO}_4$ , 1M  
174 NaCl, 5 mM  $\beta$ -mercaptoethanol, and 5 mM imidazole. The typical volume of lysis/extraction buffer  
175 used was 25 mL for a pellet harvested from 1 L of cell culture. Resuspended cells were kept on ice  
176 and lysed by sonication with the Microson XL200 Ultrasonic Cell Disruptor (Misonix). The sonication  
177 regime involved 30 s pulse treatments with 30 s pauses between pulses until the mixture appeared  
178 completely homogenous (typically after  $\sim 15$ -20 pulse treatments). The soluble protein fraction was  
179 then separated from cell lysate solids by centrifugation at 17,000 g for 30 min at 4°C. Immobilized  
180 metal affinity chromatography was used for the first purification step. The supernatant containing  
181 the soluble, 6xHis-tagged protein fraction was incubated for thirty minutes at 4°C with Talon resin  
182 (Clontech Laboratories/Takara Bio USA) that had been previously equilibrated in lysis/extraction  
183 buffer, typically employing  $\sim 1$  mL of resin for  $\sim 25$  mL of supernatant. The resin-bound protein was  
184 then transferred to a chromatography column and eluted in 1 mL fractions with a linear gradient  
185 going from 5 mM to 150 mM imidazole. Talon column fractions that contained gp11 were then  
186 pooled, concentrated by ultrafiltration, and further purified by size exclusion chromatography on a  
187 HiLoad Superdex 200 gel filtration column (GE Healthcare). The column was equilibrated and run  
188 with a buffer containing 50 mM sodium phosphate, pH 8.1, 400 mM sodium chloride, and 1 mM  
189 dithiothreitol. Fractions from the single elution peak were assessed by SDS-PAGE and combined  
190 for subsequent characterization.

### 191 2.3 Size estimation by gel filtration chromatography

192 Gel filtration chromatography was used to estimate the protein molecular weight by comparing  
193 gp11's elution profile with protein standards of known molecular weight. A commercial standard  
194 containing 5 different molecular weight markers (Biorad) was run on the same HiLoad Superdex 200  
195 16/60 column, in buffer containing 400 mM NaCl, 25 mM Tris pH 8.0, and 1 mM DTT. The standards  
196 in the mixture were Thyroglobulin (670 kDa),  $\gamma$ -globulin (158 kDa), ovalbumin (44 kDa), myoglobin  
197 (17 kDa), and Vitamin B12 (1.35 kDa). The elution volume for the peak of each standard was used  
198 to plot a standard curve, and the elution volume of gp11 was plotted on this curve to estimate the  
199 molecular weight.

#### 200 2.4 Analytical ultracentrifugation

201 Purified protein was dialyzed into a buffer containing 20 mM Tris-HCl, pH 8.1 at 20°C, 400 mM  
202 NaCl and 5 mM  $\beta$ -ME and subsequently centrifuged at 27000 g for 20 min at 4°C. Concentration was  
203 determined spectrophotometrically based on Edelhoch's method, with a predicted extinction  
204 coefficient  $\epsilon_{280} = 42400 \text{ cm}^{-1}\text{M}^{-1}$  for the 44.6 kDa monomer [32,33]. Analytical ultracentrifugation  
205 experiments were performed with an Optima XL-A analytical ultracentrifuge (Beckman Inc., Palo  
206 Alto, CA), equipped with absorbance optics and An60Ti rotor; all experiments were carried out at  
207 20° C. Absorbance data were collected by scanning the sample cells at wavelength intervals of 0.001  
208 cm in the step mode with 5 averages per step. Each experiment was conducted at two or three rotor  
209 speeds, starting with the lowest and finishing with the highest rotor speed. The sedimentation was  
210 assumed to be at equilibrium when consecutive scans, separated by intervals of 8 hours, did not  
211 indicate any change.

#### 212 2.5 Solution small-angle X-ray scattering

213 SAXS experiments were performed at the ALS beamline 12.3.1 (SIBYLS; Lawrence Berkeley  
214 National Laboratory Berkeley, CA, USA). Scattering intensities  $I(q)$  for protein and buffer samples  
215 were recorded as a function of scattering vector  $q$  ( $q = 4\pi\sin\theta/\lambda$ , where  $2\theta$  is the scattering angle and  
216  $\lambda$  is the X-ray wavelength). The sample-to-detector distance was set to 1.5 m, which resulted in a  $q$   
217 range of  $0.01 - 0.32 \text{ \AA}^{-1}$ ,  $\lambda$  was  $1.0 \text{ \AA}$  and all experiments were performed at 20 °C. The data collection  
218 strategy described by Hura was used in this study [34]. Briefly, SAXS data were collected for three  
219 protein concentrations (1.4, 2.0, and 2.7 mg/ml) and for two buffer samples. For each sample  
220 measurement, SAXS data were collected for three X-ray exposures – one long exposure (10 s) flanked  
221 by two short exposures (1 s) to assess radiation damage. Buffer scattering contributions were  
222 subtracted from sample scattering data using the program *ogreNew* (SIBYLS beamline). Data  
223 analysis was performed using the program package *PRIMUS* from the *ATSAS* suite 2.3 [35,36].  
224 Experimental SAXS data obtained for different protein concentrations were analyzed for aggregation  
225 and folding state using Guinier and Kratky plots, respectively. The forward scattering intensity  $I(0)$   
226 and the radius of gyration  $R_G$  were evaluated using the Guinier approximation:  $I(q) \approx I(0) \exp(-q^2 R_G^2)$   
227  $/ 3$ , with the limits  $q R_G < 1.3$ . These parameters were also determined from the pair-distance  
228 distribution function  $P(R)$ , which was calculated from the entire scattering patterns via indirect  
229 Fourier inversion of the scattering intensity  $I(q)$  using the program *GNOM* [37]. The maximum  
230 particle diameter  $D_{\text{max}}$  was also estimated from the  $P(R)$ . The hydrated volume  $V_P$  of the particle was  
231 computed using the Porod equation:  $V_P = 2\pi^2 I(0)/Q$ , where  $I(0)$  is the extrapolated scattering intensity  
232 at zero angle and  $Q$  is the Porod invariant [38,39]. The molecular mass of a globular protein can then  
233 be estimated from the value of its hydrated volume [39]. The overall shape of the protein was  
234 modeled *ab initio* by fitting the SAXS data to the calculated SAXS profile of a chain-like ensemble of  
235 dummy residues in reciprocal space using the program *GASBOR*, version 2.2i [40]. Ten independent  
236 calculations were performed with a D5 symmetry restriction (see below for choice of symmetry).

237

#### 238 2.6 Electron microscopy

239 A continuous carbon-film copper grid (Electron Microscopy Sciences) was plasma cleaned for  
240 30 s. 3  $\mu$ L of purified protein at 0.5 mg/ml was applied to the grid for 3 s then blotted. 3  $\mu$ L of 1%  
241 uranyl acetate (aq) stain was applied three times and blotted after each application. Grids were  
242 imaged on a JEM 2100 microscope equipped with a Gatan US4000 CCD camera.

## 243 2.7 Crystallization

244 Protein in buffer containing 50 mM sodium phosphate, pH 8.1, 400 mM sodium chloride, and 1  
245 mM dithiothreitol was concentrated via filtration to ~4.5 mg/ml. Several commercial sparse matrix  
246 screens, including the Wizard Classic screen (Rigaku) and Salt RX screen (Hampton Research), were  
247 used to determine initial crystallization conditions using an automated PHENIX crystallization robot  
248 and Intelliplate 96-well sitting drop trays (both from Art Robbins Instruments). Promising crystals  
249 were screened on a Rigaku FR-E++ X-ray generator with an RAXIS-IV++ crystallography system.  
250 Subsequent optimization screens were set up manually at various temperatures in 24 well VDX trays  
251 using hanging-drop vapor-diffusion geometry.

## 252 2.8 X-ray diffraction data collection and processing

253 Seleno-methionine derivatized gp11 crystals grown from two distinct optimized conditions (A  
254 and B) were shipped to Argonne National Laboratory, and data collected at the Advanced Photon  
255 Source beamline 21 ID-F on a MAR 225 CCD detector. Prior to freezing in liquid nitrogen, samples  
256 of crystal form A were soaked in well solution supplemented with 20% glycerol to prevent formation  
257 of crystalline ice. One microliter of cryoprotectant solution was added directly to the crystallization  
258 drop and allowed to soak for 10-30 minutes prior to freezing. Data were collected with an oscillation  
259 angle of 1.0° and one image per second, then indexed, integrated, merged and scaled with HKL-3000  
260 [41]. Crystal form B was directly frozen in liquid nitrogen; citrate in the crystallization buffer was  
261 of sufficient concentration to act as a cryoprotectant. Data were collected using the helical scan  
262 technique, translating the crystal through the x-ray beam to reduce radiation damage. Images were  
263 collected every 0.5 s in 0.5° steps.

## 264 2.9 Activity assays

265 NTPase activities for gp11 were determined using a continuous coupled assay with the enzymes  
266 pyruvate kinase and lactate dehydrogenase. The reaction scheme (figure 7a) involves uptake by  
267 pyruvate kinase of the NDP generated by the NTPase, and transfer of the phosphate group from  
268 phosphoenolpyruvate (PEP) to regenerate NTP and pyruvate. The released pyruvate is then taken by  
269 the enzyme lactate dehydrogenase, along with reduced nicotinamide adenine dinucleotide (NADH),  
270 to generate lactate and oxidized nicotinamide adenine dinucleotide (NAD<sup>+</sup>). The progression of the  
271 reaction is monitored by measuring the reduction in absorbance at 340nm as NADH is converted to  
272 NAD<sup>+</sup>. The reaction mixture contains 10 U/mL rabbit muscle pyruvate kinase, 15 U/mL rabbit muscle  
273 lactate dehydrogenase, 2mM PEP, and 0.3mM NADH. Reactions were carried out in a 50mM Tris,  
274 72mM KCl, 7.2mM MgSO<sub>4</sub> (TKM) buffer as first described in [42]; all reagents were purchased from  
275 Sigma Aldrich. Data was analyzed as the simplest case described by the Michaelis-Menten equation  
276 where NTP is rate limiting, and the steady-state rate of ATP hydrolysis,  $v$ , is given by equation 1.

$$277 \quad \frac{v}{[\varphi 28 \text{ gp11}]} = \frac{k_{cat}[NTP]}{K_m + [NTP]} \quad (1)$$

## 278 3. Results

### 279 3.1. Identification of the *ascc* $\varphi$ 28 ATPase

280 Bacteriophage  $\varphi$ 29 has long served as a model system for investigation of genome packaging in  
281 dsDNA viruses. However, attempts to crystallize its full-length dsDNA packaging ATPase have not

282 been successful. A BLAST search conducted for orthologs of the  $\phi$ 29 DNA packaging ATPase  
283 returned only eight closely related constructs (25-77% amino acid identity) that both belonged to  
284 dsDNA phages and were predicted to have an ATP-binding fold [30]. To identify potential  
285 crystallization targets, these eight sequences were run through the XtalPred server [43]. The server  
286 returned a classification of “optimal” for only one of the eight pre-selected BLAST hits, belonging to  
287 the putative DNA packaging ATPase from the *Lactococcus lactis* phage ascc $\phi$ 28 ( $\phi$ 28), which has a  
288 55.6% Smith-Waterman sequence similarity score to the  $\phi$ 29 ATPase [44]. Phage ascc $\phi$ 28 was  
289 identified as an infectious agent of dairy fermentation strains of *Lactococcus lactis* [29]. Morphological  
290 characterization and genomic analysis carried out in this same study indicated that the newly  
291 discovered phage ascc $\phi$ 28 is genetically comparable to bacteriophage  $\phi$ 29. Gross similarities to  $\phi$ 29  
292 include genome size (19-20 kbp), prolate icosahedral capsid size and morphology, and a short non-  
293 contractile tail. Additional important similarities include packaging a unit-length genome with a  
294 terminal protein covalently attached to each 5'-end and smaller versions of the portal and ATPase  
295 motor components, as compared with other phages.

### 296 3.2 Cloning, expression and purification

297 A recombinant form of open reading frame 11, the putative ATPase from ascc $\phi$ 28, was expressed  
298 in *E. coli* BL21(DE3). A large amount of soluble protein was obtained after induction with 1 mM IPTG  
299 and expression at 18°C overnight. A first purification step with Talon resin in a 50 mM sodium  
300 phosphate and 300 mM sodium chloride buffer yielded late-eluting fractions which were over 95%  
301 pure as judged by SDS-PAGE (Figure 1) [45]. A second purification step was carried out by size-  
302 exclusion chromatography in an AKTA FPLC system equipped with a High Load 16/60 Superdex 200  
303 column, resulting in greater than 95% purity. LCMS-mass spec analysis of trypsin-proteolyzed gel  
304 bands confirmed the purified protein was gp11.

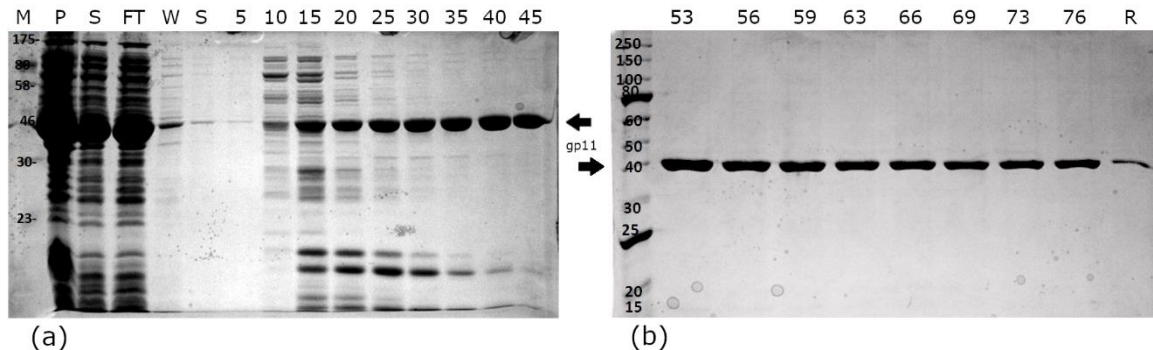

305 (a) 306 **Figure 1:** Metal-affinity purification of gp11 protein from cell lysate. SDS-PAGE gels show the early  
307 (a) and late (b) eluting fractions. Although the late-eluting fractions appeared to contain a single  
308 species, size-exclusion chromatography was used as a second purification step to increase purity.  
309 Column labels M – Molecular weight standard, P – Pellet (insoluble material from cell lysis), S –  
310 Soluble material from cell lysis, FT – Flow through from Talon resin binding, W – Wash of resin.  
311 Numbering references fractions eluted from the column. R – Residual protein remaining bound to  
312 the Talon resin

### 313 3.3 Size estimation by gel filtration chromatography

314 The chromatographic profile obtained during gel filtration suggested that the protein exists as a  
315 large assembly. Gp11 has a calculated molecular mass of 44.6 kDa but eluted from the Superdex 200  
316 gel filtration column near the beginning of the elution profile, suggesting a larger molecular weight.  
317 Comparison to a typical elution profile of standard proteins in the same chromatographic medium  
318 and flow rate pointed towards an apparent molecular weight between that of IgG (158 KDa) and  
319 Ferritin (440 KDa) (figure 2), suggesting that gp11 had assembled a higher order oligomer with

320 between ~4 and ~10 copies. Similarly, while SDS-PAGE bands were consistent with a 45 kDa protein,  
321 native PAGE again showed a higher apparent molecular weight (results not shown).

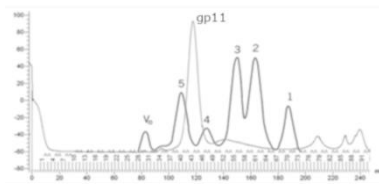

322

323 **Figure 2:** Light gray line is a typical elution profile from a Superdex 200 (16/60) gel filtration column  
324 for gp11-containing fractions combined after metal-affinity purification. Dark gray overlay is the  
325 elution profile of a standard protein mixture over the same flow rate conditions. Standards are 1.  
326 Myoglobin,  $M_r$  17,000 Da; 2. Ovalbumin,  $M_r$  43,000 Da; 3. Albumin,  $M_r$  67,000 Da; 4. IgG,  $M_r$  158,000;  
327 5. Ferritin,  $M_r$  440,000.

### 328 3.4 Analytical ultracentrifugation

329 To determine the molecular weight of the assembly observed in gel filtration and native gel  
330 electrophoresis, we carried out analytical ultracentrifugation measurements. Sedimentation  
331 equilibrium experiments were performed for multiple rotor speeds (figure 3). The smooth curves  
332 overlying the data are simulations using the best fit parameters resulting from a global NLLS  
333 with  $M_i$  and  $b$  as fitting parameters. For the  $n$ -component system, the total concentration at radial  
334 position  $r$ ,  $c_r$ , is defined by:

$$335 \quad c_r = \sum_{i=1}^n c_{b,i} \exp \left[ \frac{(1 - \bar{v}_i \rho) \omega^2 M_i (r^2 - r_b^2)}{2RT} \right] + b \quad (3)$$

336 where  $c_{b,i}$ ,  $v_i$ , and  $M_i$  are the concentration at the bottom of the cell, partial specific volume, and  
337 molecular mass of the "I" component, respectively;  $\rho$  is the density of the solution,  $\omega$  is the  
338 angular velocity, and  $b$  is the base-line error term. Partial specific volume of gp11 ( $v_i$ ) was  
339 calculated from the amino acid composition of the protein according to Lee and Timasheff [46]  
340 and was 0.738 mL/g. The molecular mass calculated from the amino acid composition of gp11 is  
341 44,585 Da. Molecular mass for the sample was  $443,472 \pm 8000$  Da which is consistent with a  
342 decameric assembly of gp11. Sedimentation velocity experiments also indicated a single species  
343 corresponding to a decamer (data not shown).

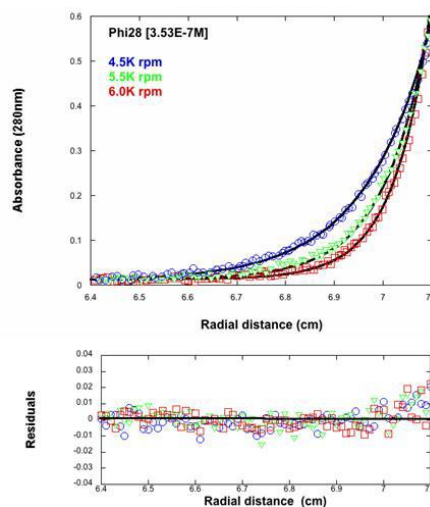

344

345 **Figure 3:** Sedimentation equilibrium centrifugation of gp11. Rotor speeds were 4.5, 5.5, and 6.0  
346 kRPM. Protein concentration was 0.353  $\mu$ M (0.016 mg/mL). In solution, gp11 has an apparent  
347 molecular weight of 443 kDa, about ten times the monomeric weight.

348 3.5 Small-angle X-ray scattering:



349 To further characterize the size of gp11 and obtain information regarding the shape of the  
 350 quaternary gp11 assembly in solution, we conducted solution x-ray scattering experiments in  
 351 the same Tris/NaCl buffer used in AUC experiments. No radiation damage was detected over  
 352 the 10 s exposure time, so data obtained after the long exposure was used for analysis. The  
 353 scattering data are not dependent on protein concentration, as the scattering curves  
 354 superimposed well for protein samples at concentrations ranging from 1.4 to 2.7 mg/mL (figure  
 355 4).

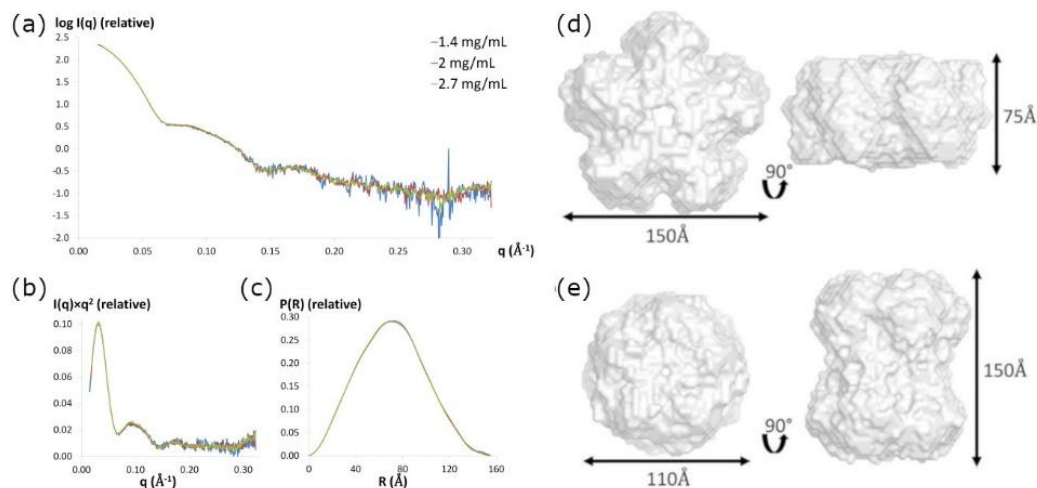

356  
 357 **Figure 4:** (a) Experimental scattering patterns for three concentrations of asccp28 gp11 scaled to  
 358 concentration. (b) Kratky plots and (c) pair-distance distance distribution functions  $P(R)$  of asccp28  
 359 gp11 for three concentrations. Two classes of molecular envelopes, generated using GASBOR, are  
 360 consistent with the X-ray scattering curve of gp11. D5 symmetry was imposed. Either a flatter oblate  
 361 cylinder (d) or a more elongated prolate cylinder (e) are consistent with the SAXS measurements.

362 Two independent methods, the Guinier approximation and the pair-distribution function  
 363  $P(R)$ , were used to calculate the radius of gyration ( $R_G$ ) value for each protein concentration.  
 364 Both methods provided similar  $R_G$  values, with  $\approx 55 \pm 2 \text{ \AA}$  calculated from the Guinier  
 365 approximation and  $\approx 54 \pm 1 \text{ \AA}$  estimated from the pair-distance distribution function  $P(R)$  (Table  
 366 1). The maximum dimension of the particle,  $D_{\max}$ , was found to be  $155 \pm 5 \text{ \AA}$  by examining where  
 367 the pair-distance distribution function went to zero. The hydrated particle volume ( $VP$ ) was  
 368 estimated between 745.6 and 778.6  $\text{nm}^3$ , corresponding to average molecular masses between  
 369 426.1 and 444.9 kDa, again indicating that gp11 forms a decameric assembly in solution (Table  
 370 1).

371 **Table 1:** SAXS parameters for the gp11 particle.

| Protein concentration | $R_G$ (Guinier) ( $\text{\AA}$ ) | $D_{\max}$ ( $P(R)$ ) ( $\text{\AA}$ ) | $R_G$ (real space, $P(R)$ ) ( $\text{\AA}$ ) | Hydrated volume (Porod) ( $\text{nm}^3$ ) | Estimated molecular mass (kDa) | Number of Monomers |
|-----------------------|----------------------------------|----------------------------------------|----------------------------------------------|-------------------------------------------|--------------------------------|--------------------|
| 1.4 mg/mL             | 54.8                             | 155                                    | 53.8                                         | 745.6                                     | 426.1                          | 9.5                |
| 2.0 mg/mL             | 55.1                             | 155                                    | 53.7                                         | 778.6                                     | 444.9                          | 9.9                |
| 2.7 mg/mL             | 55.2                             | 155                                    | 53.6                                         | 760.6                                     | 434.6                          | 9.7                |

372 **3.6 SAXS *ab initio* shape calculations:**

373 The shape of the decamer in solution can be approximated from the shapes of the Kratky  
 374 plot and the pair-distance distribution function,  $P(R)$ . The Kratky plot ( $I(q) \times q^2$  vs.  $q$ ) (figure 4b)  
 375 shows a bell-shaped peak at low angles that indicates a well-folded protein, and the pair-  
 376 distance distribution function,  $P(R)$ , shows a characteristic shape of a hollow globular, likely

377 cylindrical, particle (Figure 4c) [39,47,48]. Eleven molecular envelopes of the decameric assembly  
378 were then obtained using the program GASBOR with D5 symmetry imposed on the SAXS data  
379 (X-ray diffraction results support this symmetry constraint, see results and discussion below).  
380 These molecular envelopes are indeed hollow cylinders, but segregate into two different classes  
381 with similar dimensions: an oblate shape for 6 models (model 1  $\approx 150 \text{ \AA} \times 75 \text{ \AA}$ , figure 4d) and  
382 prolate shape for 5 models (model 2  $\approx 150 \text{ \AA} \times 110 \text{ \AA}$ , figure 4e). Scattering curves from both  
383 classes of envelopes fit the experimental scattering data well, with  $\chi^2$  values ranging from 1.1 to  
384 1.2.

### 385 3.7 Electron microscopy:

386 Negative stain images show a uniform collection of particles  $\sim 140\text{-}160 \text{ \AA}$  long and  $\sim 110\text{-}120$   
387  $\text{ \AA}$  wide (figure 5). Most particles appear oblong, with an occasional nearly circular particle,  
388 presumably representing side and top views, respectively. All particles have a central dark spot,  
389 consistent with extra stain collecting in a void or channel. Based on the observed dimensions of  
390 side and top views and the accumulation of stain within particles, these results suggest a hollow  
391 cylindrical assembly, consistent with the prolate SAXS model.

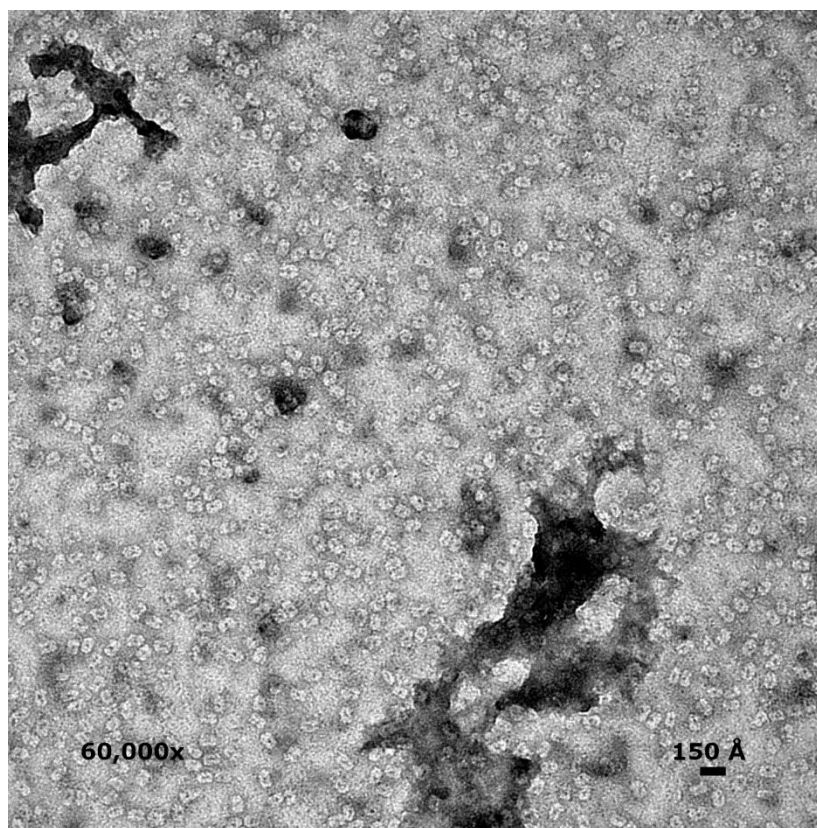

392  
393 **Figure 5:** Uranyl acetate staining of gp11 showed cylindrical particles with heavily stained central  
394 regions. Magnification is 60,000x. These images more closely resemble the prolate envelope predicted by  
395 SAXS. A hollow cylinder would allow DNA to pass through the central channel of the motor.

### 396 3.8 Crystallization:

397 Initial crystals of gp11 were obtained from the Wizard Classic screen (Rigaku) in 2 M  
398 ammonium sulfate, 0.1 M sodium citrate, pH 5.5 and Salt RX screen (Hampton Research) in 0.7  
399 M citrate, 0.1 M Tris, pH 8.5. Gp11 has a predicted pI of 6.44, and thus would be positively or  
400 negatively charged, respectively, in the two conditions. Each condition served as the starting  
401 point for optimization, and crystals exceeding  $100 \mu\text{m}$  were eventually grown in 24-well VDX  
402 trays by hanging-drop vapor-diffusion over  $1000 \mu\text{L}$  of well solution. A rhombohedral crystal  
403 (figure 6a) was grown over wells containing 1.5-1.8 M ammonium sulfate, 0.1 M citrate, pH 5.3-  
404 5.7. The drop consisted of  $1 \mu\text{L}$  protein at 4.3 mg/ml mixed with  $1 \mu\text{L}$  well solution containing 1.6

405 M ammonium sulfate, 0.1 M trisodium citrate, pH 5.7. The pH of trisodium citrate buffers was  
406 adjusted with hydrochloric acid. Crystals appeared after 2-4 days. Bi-pyramidal crystals (figure  
407 6b) were grown from basic conditions containing 1.0 M trisodium citrate, 0.1 M Tris pH 8.3. The  
408 final pH of this well solution was measured at 8.9. Protein concentration was 3.1 mg/ml, and  
409 1.5  $\mu$ L of protein was combined with an equal volume of well solution. Both solutions were  
410 pre-chilled, and the tray was set up and incubated at 277 K. Well-formed crystals typically took  
411 more than a month to grow.

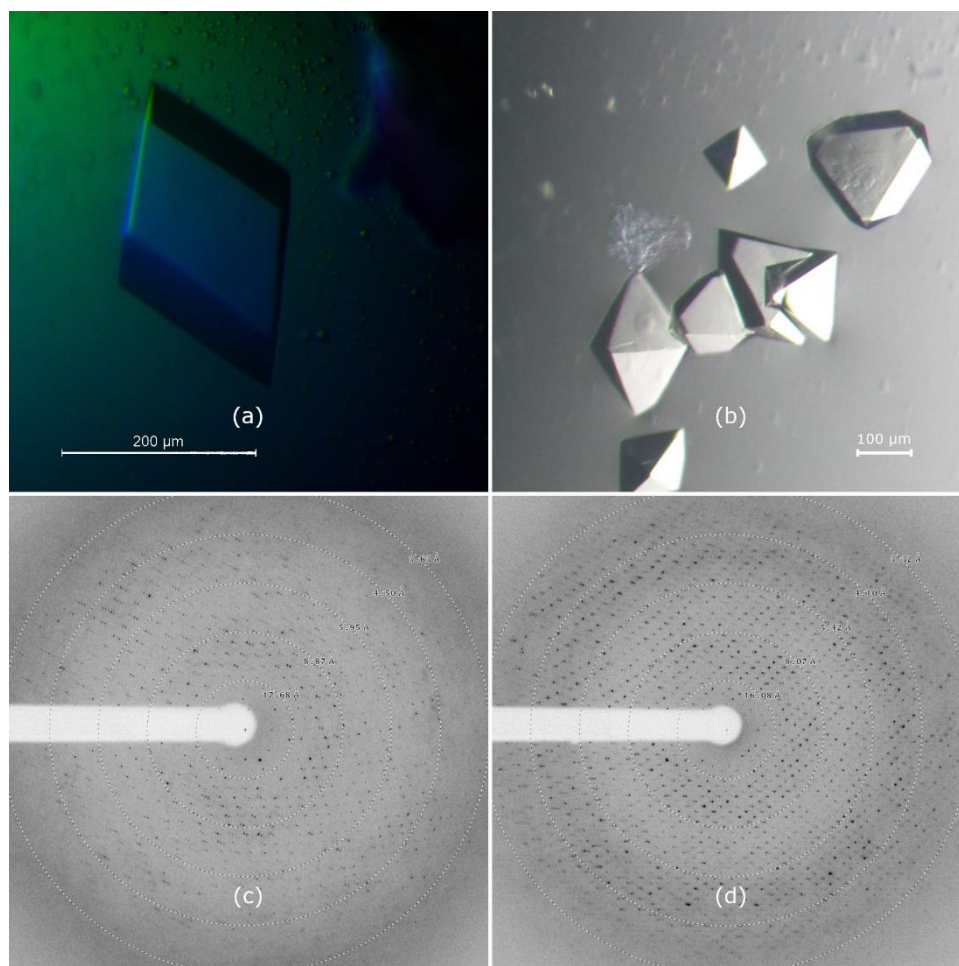

412  
413 **Figure 6:** Crystals of gp11 grown under optimized conditions. (a) Crystal form A, grown in 1.6 M  
414 ammonium sulfate, 0.1 M trisodium citrate, pH 5.7. Crystals are rhombohedral with a maximum  
415 edge length of 200  $\mu$ m. (b) Crystals form B, grown in 1.0 M trisodium citrate, 0.1 M  
416 tris(hydroxymethyl)aminomethane (Tris), pH 8.4. The truncated octahedron in the upper right  
417 measures approximately 150  $\mu$ m  $\times$  150  $\mu$ m  $\times$  50  $\mu$ m. (c) Diffraction pattern for Crystal Form A,  
418 which indexed to space group  $P\bar{3}x21$ . (d) Diffraction pattern for Crystal Form B, showing spots to  
419  $\sim 2.8$  Å, which indexed to  $P4̄(1,3)212$ .

### 420 3.9 Crystal X-ray diffraction:

421 Diffraction data for optimized crystals were collected at Advanced Photon Source beamline  
422 21 ID-F on a MAR 225 CCD detector. Diffraction patterns for each crystal are shown in figure  
423 6, and data collection parameters summarized in table 2. Maximum diffraction of crystal form  
424 A extended to a resolution of  $\sim 3.3$  Å. The crystal indexed as a primitive trigonal lattice type with  
425 unit cell dimensions  $a=b=135.0$  Å,  $c=76.7$  Å. Systemic absences and merging statistics of  
426 symmetry related reflections were consistent with space group  $P\bar{3}x21$ . The bi-pyramidal B-form  
427 crystals diffracted to 2.8 Å and were indexed as a primitive tetragonal lattice with unit cell  
428 dimensions  $a=b=110.9$  Å,  $c=351.8$  Å. Systematic absences and merging statistics of symmetry  
429 related reflections in this data set were consistent with space group  $P4̄(1,3)212$ . Matthews

430 coefficient estimations of both crystal forms indicated a solvent content between 40 and 60%,  
431 corresponding to 4-7 ATPase copies in the asymmetric unit.

432

433 **Table 2:** X-ray diffraction data collection and processing. Values for the outer shell are given in  
434 parentheses.

|                                                            | APS 21 ID-F         | APS 21 ID-F                      |
|------------------------------------------------------------|---------------------|----------------------------------|
| Diffraction source                                         | APS 21 ID-F         | APS 21 ID-F                      |
| Wavelength (Å)                                             | 0.97872             | 0.97872                          |
| Temperature (K)                                            | 100                 | 100                              |
| Detector                                                   | MAR 225 CCD         | MAR 225 CCD                      |
| Crystal-detector distance (mm)                             | 550                 | 500                              |
| Rotation range per image (°)                               | 1                   | 0.5                              |
| Total rotation range (°)                                   | 720                 | 720                              |
| Exposure time per image (s)                                | 1                   | 0.5                              |
| Space group                                                | P3 <sub>1</sub> 21  | P4 <sub>1</sub> 2 <sub>1</sub> 2 |
| <i>a</i> , <i>b</i> , <i>c</i> (Å)                         | 135.0, 135.0, 276.7 | 351.8, 110.9, 110.9              |
| $\alpha$ , $\beta$ , $\gamma$ (°)                          | 90, 90, 120         | 90, 90, 90                       |
| Mosaicity (°)                                              | 0.4                 | 0.5                              |
| Resolution range (Å)                                       | 50 – 3.3            | 50 – 2.8                         |
| Total No. of reflections                                   | 3,916,456           | 555,523                          |
| No. of unique reflections                                  | 38,921              | 44,804                           |
| Completeness (%)                                           | 99.7 (95.9)         | 99.6 (98.8)                      |
| Redundancy                                                 | 39.7 (20.5)         | 12.4 (6.2)                       |
| $\langle I/\sigma(I) \rangle$                              | 30.2 (1.4)          | 11.4 (0.9)                       |
| <i>R</i> <sub>r.i.m.</sub>                                 | 0.024 (0.50.4)      | 0.060 (0.69)                     |
| Overall <i>B</i> factor from Wilson plot (Å <sup>2</sup> ) | 121                 | 51                               |

435

### 436 3.10 Activity assays

437 We measured ATPase activity for gp11 to assess whether the synthetic gene coded for an  
438 active enzyme product with the predicted NTPase activity. ATPase activity was determined by  
439 a coupled assay using the enzymes pyruvate kinase and lactate dehydrogenase, as shown in  
440 figure 7a. Reduction in absorbance at 340nm as a result of NADH depletion was monitored to  
441 assess the progression of the reaction. The change in absorbance units per unit time was obtained  
442 from the linear region of progress curves after steady state rates were observed for periods over  
443 five minutes. The values obtained from these slopes were then plotted as a function of substrate  
444 concentration (figure 7b) and the resulting curve was modeled by a nonlinear combination of  
445 the parameters  $V_{\max}$  and  $K_m$  in the modified Michaelis-Menten equation:

$$446 \quad v = \frac{V_{\max}[NTP]}{K_m + [NTP]} \quad (2)$$

447 The values for  $V_{\max}$  and  $K_m$  obtained from the nonlinear regression analysis were  $7.6 \times 10^{-7} \text{ Ms}^{-1}$   
448 and  $28 \mu\text{M}$ , respectively. Also, from  $V_{\max} = [\text{gp11}]k_{\text{cat}}$ ,  $k_{\text{cat}}$  was found to be  $0.849 \text{ s}^{-1}$ .

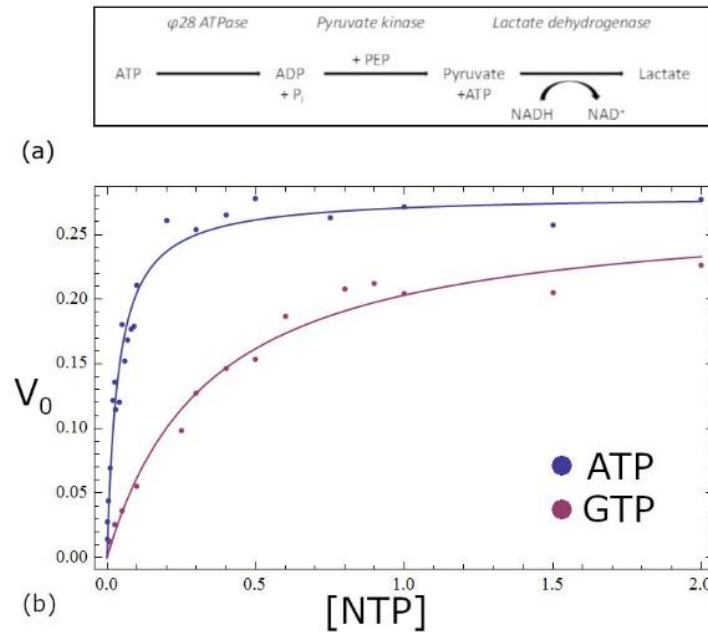

449

450 **Figure 7:** Steady-state kinetics for the asccφ28 encapsidation protein. (a) The gp11 ATPase produces  
 451 ADP from ATP. Two subsequent enzymatic steps result in the conversion of NADP to NAD<sup>+</sup>, which  
 452 is measured with a spectrophotometer. ATP hydrolysis by gp11 is the limiting reaction step, with all  
 453 other reactants in large excess, so the ATP hydrolysis rate can be correlated with the measured  
 454 reduction in NADP. (b) The upper blue plot represents ATP substrate, and lower magenta plot  
 455 represents GTP. The 10-fold lower  $K_m$  for ATP indicates that gp11 is primarily an ATPase.

456 Since many NTPases are promiscuous regarding their selection of NTP substrates, we  
 457 tested whether our construct was indeed primarily an ATPase. This information is important  
 458 since nucleoside triphosphate preference can offer clues as to the protein's primary function.  
 459 While there are many examples of GTPases within the NTP P-loop superfamily common to  
 460 motor proteins, no GTPase has been reported to power genome encapsidation in phages, or in  
 461 related motor proteins involved in nucleic acid recombination or unwinding [9]. The kinetic  
 462 parameters found for GTP as a substrate were:  $K_m=344 \mu\text{M}$ ,  $V_{\text{max}}=7.31 \times 10^{-7} \text{ Ms}^{-1}$  and  $k_{\text{cat}}=0.817 \text{ s}^{-1}$ .  
 463 Kinetic parameters for both substrates are summarized in Table 3. Based on the 10-fold  
 464 increase in the  $K_m$  value that occurred from switching from ATP to GTP,  $28 \mu\text{M}$  to  $344 \mu\text{M}$ , it  
 465 seems that gp11 prefers ATP as a substrate.

466

**Table 3:** Kinetic parameters for the hydrolysis of NTP by gp11.

|                  | ATP                                   | GTP                                   |
|------------------|---------------------------------------|---------------------------------------|
| $K_m$            | $28 \mu\text{M}$                      | $344 \mu\text{M}$                     |
| $V_{\text{max}}$ | $7.53 \times 10^{-7} \text{ Ms}^{-1}$ | $7.31 \times 10^{-7} \text{ Ms}^{-1}$ |
| $k_{\text{cat}}$ | $0.849 \text{ s}^{-1}$                | $0.817 \text{ s}^{-1}$                |

467

#### 468 4. Discussion

469 Genome packaging motors have been studied extensively in several dsDNA bacteriophage  
 470 systems. Proposed motor mechanisms invoke complex multi-step processes that require strict  
 471 coordination between motor components to efficiently generate force. However, the molecular basis  
 472 of subunit coordination and force generation remains unknown, largely due to challenges in  
 473 structurally and biophysically characterizing the oligomeric ATPase ring motors that drive  
 474 packaging. In currently available phage packaging systems, these ATPases typically have low  
 475 solubility and are present only as monomers in solution. Thus, it is not possible to directly observe  
 476 and interrogate the intermolecular interactions that regulate or coordinate ATP hydrolysis, force

477 generation, or DNA translocation. Here, we report the biochemical, biophysical, and preliminary  
478 structural characterization of gp11, a DNA packaging ATPase from bacteriophage ascc $\phi$ 28.

479 Phage ascc $\phi$ 28 is genetically and morphologically similar to the well-studied bacteriophage  $\phi$ 29,  
480 yet there is no evidence for the unusual pRNA molecule that serves as a scaffold for assembly of a  
481 functional ATPase ring motor in  $\phi$ 29. Hence, we hypothesized that gp11 might assemble as functional  
482 ATPase rings in solution. Otherwise, ascc $\phi$ 28 is like  $\phi$ 29; gp11 and the ascc $\phi$ 28 portal protein are  
483 smaller and functionally simpler than their counterparts in genome-cutting packaging phages.  
484 Hence, ascc $\phi$ 28's dsDNA encapsidation machinery may represent the minimum functional assembly  
485 of a viral dsDNA genome packaging motor. These properties, compositional simplicity and assembly  
486 of a functional ATPase ring motor, should facilitate detailed structural, biochemical, and biophysical  
487 analysis of a viral dsDNA packaging motor.

488 A recombinant, codon-optimized gene for gp11 was synthesized and expressed in *E. coli* with a  
489 C-terminal hexa-histidine tag to facilitate purification via metal ion affinity chromatography. After  
490 elution on a cobalt-containing Talon column, size-exclusion chromatography indicated that the  
491 protein assembled as a multimer in solution. Comparison to a standard elution curve of proteins with  
492 known molecular weight indicated a possible weight for the assembly ranging from 158 to 440 kDa.  
493 Subsequent sedimentation velocity and equilibrium analysis showed that gp11 is best represented as  
494 a single species in solution, with a molecular weight of ~445 kDa, which would correspond to a  
495 decameric assembly. Estimation of the Porod volume via small angle X-ray scattering confirmed this  
496 molecular weight, and further analysis of low angle scattering data provided additional shape  
497 information suggesting the assembly formed a cylinder, likely prolate in shape but possibly oblate.  
498 Negative stain EM allowed us to distinguish between these possibilities, clearly showing a prolate  
499 cylinder. Interestingly, while all biophysical mass and volume estimates pointed toward a decameric  
500 assembly, the dimensions of the asymmetric units in the two different X-ray crystallographic space  
501 groups could only accommodate between 4 and 7 copies of the ~45 kDa gp11 monomer. However,  
502 both space groups have crystallographic 2-fold axes of symmetry, suggesting that a molecular 2-fold  
503 symmetry axis is incorporated into global crystallographic symmetry. Hence, the simplest  
504 explanation parsimonious with the aggregate data is that gp11 is a decamer in solution, with  
505 approximate D<sub>5</sub> molecular symmetry, i.e., an assembly consisting of two pentameric rings related by  
506 2-fold symmetry.

507 While we cannot rule out the possibility that gp11 actually functions as a decamer when  
508 assembled on procapsids, we suspect that the dimerization of the two pentameric rings is an artifact  
509 of over-expression in the absence of ascc $\phi$ 28 procapsids. A significant argument against a  
510 biologically functional decamer is that the 2-fold symmetry axis relating the two pentameric rings  
511 requires that the two rings face opposite directions, either head-to-head or tail-to-tail. Hence, if both  
512 rings were to interact with DNA, the directions of imposed force would seem to cancel each other as  
513 the motor plays tug-of-war with the dsDNA substrate. Further, it is well established that the gp11  
514 homologue in the closely related bacteriophage  $\phi$ 29 is a pentamer, as are the packaging ATPases in  
515 the more distantly related T4, T7, and P74-26 bacteriophages, suggesting that the biological assembly  
516 is a single pentameric ring.

517 Biochemical analysis of gp11 suggests that it binds and hydrolyzes ATP with affinities and rates  
518 similar to the functional ring forms of these other phage packaging ATPases. With the exception of  
519 bacteriophage lambda [27], recombinantly expressed packaging ATPases in other phages are  
520 monomeric, and are unable to bind and/or hydrolyze ATP when expressed recombinantly. Only  
521 upon oligomerization as pentameric rings on their respective procapsids are these enzymes able to  
522 bind and hydrolyze ATP. Hence the comparable ATP affinities and turn-over rates observed for  
523 recombinantly expressed gp11 suggests that the assembled pentameric rings reflect the biological  
524 assembly of the packaging ATPase on the procapsid.

525

## 526 5. Conclusions

527 Genome packaging motors have been studied extensively in several bacteriophage systems.  
528 Proposed motor mechanisms invoke multi-step processes that require strict coordination between  
529 motor components. However, the molecular basis of subunit coordination and force generation  
530 remains unknown, largely due to challenges in characterizing the ATPases that drive packaging. In  
531 currently available phage packaging systems, these ATPases typically have low solubility and are  
532 present as monomers in solution. Thus, it is not possible to directly observe and interrogate the  
533 intermolecular interactions that regulate or coordinate ATP hydrolysis and DNA translocation.  
534 Here, we report the expression and characterization of a DNA packaging ATPase from bacteriophage  
535 ascc $\phi$ 28 that self-assembles as a homomeric ring with high ATPase activity. These properties are  
536 promising for the detailed structural, biochemical, and biophysical analysis of a viral dsDNA  
537 packaging system.

538

539 **Author Contributions:** Conceptualization, E.R.A., E.A.D., W.M.B., K.H.C and M.C.M; methodology,  
540 investigation and formal analysis, E.R.A., E.A.D., C.B., M.R.S., G.D., P.M., M.A.W and W.M.B.;  
541 writing E.R.A., E.A.D. and M.C.M; visualization, E.R.A and E.A.D.; supervision and funding  
542 acquisition, K.H.C and M.C.M.

543 **Funding:** This research was funded by Public Health Service grants GM122979 and GM127365 to  
544 M.C.M., NIH grant T32GM008280 to Baylor College of Medicine, and AI 087856 to K.H.C.

545 **Acknowledgments:** The authors acknowledge the Sealy Center for Structural Biology and  
546 Molecular Biophysics at the University of Texas Medical Branch at Galveston for providing research  
547 resources.

548 E.R.A. received a Houston Area Molecular Biophysics Training Program fellowship, funded by NIH  
549 grant T32GM008280 to Baylor College of Medicine, and a substantial portion of these experiments  
550 were complete as part of his Master's degree work.

551 **Conflicts of Interest:** The authors declare no conflict of interest.

552

## 553 References

554

- 555 1. Catalano, C.E. The terminase enzyme from bacteriophage lambda: a DNA-packaging machine. *Cell Mol*  
556 *Life Sci* **2000**, *57*, 128-148, doi:10.1007/s000180050503.
- 557 2. Rao, V.B.; Feiss, M. The bacteriophage DNA packaging motor. *Annu Rev Genet* **2008**, *42*, 647-681,  
558 doi:10.1146/annurev.genet.42.110807.091545.
- 559 3. Morais, M.C. The dsDNA packaging motor in bacteriophage  $\phi$ 29. *Adv Exp Med Biol* **2012**, *726*, 511-547,  
560 doi:10.1007/978-1-4614-0980-9\_23.
- 561 4. Rao, V.B.; Feiss, M. Mechanisms of DNA Packaging by Large Double-Stranded DNA Viruses. *Annu Rev*  
562 *Virology* **2015**, *2*, 351-378, doi:10.1146/annurev-virology-100114-055212.
- 563 5. Myers, C.G.; Pettitt, B.M. Communication: Origin of the contributions to DNA structure in phages. *J*  
564 *Chem Phys* **2013**, *138*, 071103, doi:10.1063/1.4791708.
- 565 6. Bores, C.; Pettitt, B.M. Structure and the role of filling rate on model dsDNA packed in a phage capsid.  
566 *Phys Rev E* **2020**, *101*, 012406, doi:10.1103/PhysRevE.101.012406.
- 567 7. Mitchell, M.S.; Matsuzaki, S.; Imai, S.; Rao, V.B. Sequence analysis of bacteriophage T4 DNA  
568 packaging/terminase genes 16 and 17 reveals a common ATPase center in the large subunit of viral  
569 terminases. *Nucleic Acids Res* **2002**, *30*, 4009-4021.

- 570 8. Koti, J.S.; Morais, M.C.; Rajagopal, R.; Owen, B.A.; McMurray, C.T.; Anderson, D.L. DNA packaging  
571 motor assembly intermediate of bacteriophage phi29. *J Mol Biol* **2008**, *381*, 1114-1132,  
572 doi:10.1016/j.jmb.2008.04.034.
- 573 9. Leipe, D.D.; Wolf, Y.I.; Koonin, E.V.; Aravind, L. Classification and evolution of P-loop GTPases and  
574 related ATPases. *J Mol Biol* **2002**, *317*, 41-72, doi:10.1006/jmbi.2001.5378.
- 575 10. Iyer, L.M.; Leipe, D.D.; Koonin, E.V.; Aravind, L. Evolutionary history and higher order classification  
576 of AAA+ ATPases. *J Struct Biol* **2004**, *146*, 11-31, doi:10.1016/j.jsb.2003.10.010.
- 577 11. Iyer, L.M.; Makarova, K.S.; Koonin, E.V.; Aravind, L. Comparative genomics of the FtsK-HerA  
578 superfamily of pumping ATPases: implications for the origins of chromosome segregation, cell division  
579 and viral capsid packaging. *Nucleic Acids Res* **2004**, *32*, 5260-5279, doi:10.1093/nar/gkh828.
- 580 12. Burroughs, A.M.; Iyer, L.M.; Aravind, L. Comparative genomics and evolutionary trajectories of viral  
581 ATP dependent DNA-packaging systems. *Genome Dyn* **2007**, *3*, 48-65, doi:10.1159/000107603.
- 582 13. Smith, D.E.; Tans, S.J.; Smith, S.B.; Grimes, S.; Anderson, D.L.; Bustamante, C. The bacteriophage  
583 straight phi29 portal motor can package DNA against a large internal force. *Nature* **2001**, *413*, 748-752,  
584 doi:10.1038/35099581.
- 585 14. Liu, S.; Chistol, G.; Hetherington, C.L.; Tafoya, S.; Aathavan, K.; Schnitzbauer, J.; Grimes, S.; Jardine,  
586 P.J.; Bustamante, C. A viral packaging motor varies its DNA rotation and step size to preserve subunit  
587 coordination as the capsid fills. *Cell* **2014**, *157*, 702-713, doi:10.1016/j.cell.2014.02.034.
- 588 15. Yang, L.; Yang, Q.; Wang, M.; Jia, R.; Chen, S.; Zhu, D.; Liu, M.; Wu, Y.; Zhao, X.; Zhang, S., et al.  
589 Terminase Large Subunit Provides a New Drug Target for Herpesvirus Treatment. *Viruses* **2019**, *11*,  
590 doi:10.3390/v11030219.
- 591 16. Mahler, B.P.; Bujalowski, P.J.; Mao, H.; Dill, E.A.; Jardine, P.J.; Choi, K.H.; Morais, M.C. NMR structure  
592 of a vestigial nuclease provides insight into the evolution of functional transitions in viral dsDNA  
593 packaging motors. *bioRxiv* **2020**, 10.1101/2020.07.06.188573, 2020.2007.2006.188573,  
594 doi:10.1101/2020.07.06.188573.
- 595 17. Simpson, A.A.; Tao, Y.; Leiman, P.G.; Badasso, M.O.; He, Y.; Jardine, P.J.; Olson, N.H.; Morais, M.C.;  
596 Grimes, S.; Anderson, D.L., et al. Structure of the bacteriophage phi29 DNA packaging motor. *Nature*  
597 **2000**, *408*, 745-750, doi:10.1038/35047129.
- 598 18. Chistol, G.; Liu, S.; Hetherington, C.L.; Moffitt, J.R.; Grimes, S.; Jardine, P.J.; Bustamante, C. High degree  
599 of coordination and division of labor among subunits in a homomeric ring ATPase. *Cell* **2012**, *151*, 1017-  
600 1028, doi:10.1016/j.cell.2012.10.031.
- 601 19. Liu, S.; Chistol, G.; Bustamante, C. Mechanical operation and intersubunit coordination of ring-shaped  
602 molecular motors: insights from single-molecule studies. *Biophys J* **2014**, *106*, 1844-1858,  
603 doi:10.1016/j.bpj.2014.03.029.
- 604 20. Pajak, J.; Dill, E.; White, M.A.; Kelch, B.A.; Jardine, P.; Arya, G.; Morais, M.C. Atomistic Mechanism of  
605 Force Generation, Translocation, and Coordination in a Viral Genome Packaging Motor. *bioRxiv* **2020**,  
606 10.1101/2020.07.27.223032, 2020.2007.2027.223032, doi:10.1101/2020.07.27.223032.
- 607 21. Woodson, M.; Pajak, J.; Zhao, W.; Zhang, W.; Arya, G.; White, M.A.; Jardine, P.J.; Morais, M.C. A viral  
608 genome packaging motor transitions between cyclic and helical symmetry to translocate dsDNA.  
609 *bioRxiv* **2020**, 10.1101/2020.05.23.112524, 2020.2005.2023.112524, doi:10.1101/2020.05.23.112524.
- 610 22. Guo, P.X.; Bailey, S.; Bodley, J.W.; Anderson, D. Characterization of the small RNA of the bacteriophage  
611 phi 29 DNA packaging machine. *Nucleic Acids Res* **1987**, *15*, 7081-7090.



- 612 23. Morais, M.C.; Tao, Y.; Olson, N.H.; Grimes, S.; Jardine, P.J.; Anderson, D.L.; Baker, T.S.; Rossmann,  
613 M.G. Cryoelectron-microscopy image reconstruction of symmetry mismatches in bacteriophage phi29.  
614 *J Struct Biol* **2001**, *135*, 38-46, doi:10.1006/jjsbi.2001.4379.
- 615 24. Morais, M.C.; Choi, K.H.; Koti, J.S.; Chipman, P.R.; Anderson, D.L.; Rossmann, M.G. Conservation of  
616 the capsid structure in tailed dsDNA bacteriophages: the pseudoatomic structure of phi29. *Mol Cell*  
617 **2005**, *18*, 149-159, doi:10.1016/j.molcel.2005.03.013.
- 618 25. Morais, M.C.; Koti, J.S.; Bowman, V.D.; Reyes-Aldrete, E.; Anderson, D.L.; Rossmann, M.G. Defining  
619 molecular and domain boundaries in the bacteriophage phi29 DNA packaging motor. *Structure* **2008**,  
620 *16*, 1267-1274, doi:10.1016/j.str.2008.05.010.
- 621 26. Sun, S.; Kondabagil, K.; Draper, B.; Alam, T.I.; Bowman, V.D.; Zhang, Z.; Hegde, S.; Fokine, A.;  
622 Rossmann, M.G.; Rao, V.B. The structure of the phage T4 DNA packaging motor suggests a mechanism  
623 dependent on electrostatic forces. *Cell* **2008**, *135*, 1251-1262, doi:10.1016/j.cell.2008.11.015.
- 624 27. Andrews, B.T.; Catalano, C.E. The enzymology of a viral genome packaging motor is influenced by the  
625 assembly state of the motor subunits. *Biochemistry* **2012**, *51*, 9342-9353, doi:10.1021/bi300890y.
- 626 28. Mao, H.; Saha, M.; Reyes-Aldrete, E.; Sherman, M.B.; Woodson, M.; Atz, R.; Grimes, S.; Jardine, P.J.;  
627 Morais, M.C. Structural and Molecular Basis for Coordination in a Viral DNA Packaging Motor. *Cell*  
628 *Rep* **2016**, *14*, 2017-2029, doi:10.1016/j.celrep.2016.01.058.
- 629 29. Kotsonis, S.E.; Powell, I.B.; Pillidge, C.J.; Limsowtin, G.K.; Hillier, A.J.; Davidson, B.E. Characterization  
630 and genomic analysis of phage ascphi28, a phage of the family Podoviridae infecting *Lactococcus*  
631 *lactis*. *Appl Environ Microbiol* **2008**, *74*, 3453-3460, doi:10.1128/AEM.02379-07.
- 632 30. Altschul, S.; Madden, T.L.; Schaffer, A.; Zhang, J.; Zhang, Z.; Miller, W.E.; Lipman, D.J. Gapped BLAST  
633 and PSI-BLAST: a new generation of protein databases search programs. *Nucleic acids research* **1997**, *25*,  
634 3389-3402, doi:10.1093/nar/25.17.3389.
- 635 31. Hochuli, E. Large-scale chromatography of recombinant proteins. *J Chromatogr* **1988**, *444*, 293-302,  
636 doi:10.1016/s0021-9673(01)94032-4.
- 637 32. Edelhoch, H. Spectroscopic determination of tryptophan and tyrosine in proteins. *Biochemistry* **1967**, *6*,  
638 1948-1954, doi:10.1021/bi00859a010.
- 639 33. Gill, S.C.; von Hippel, P.H. Calculation of protein extinction coefficients from amino acid sequence data.  
640 *Anal Biochem* **1989**, *182*, 319-326, doi:10.1016/0003-2697(89)90602-7.
- 641 34. Hura, G.L.; Menon, A.L.; Hammel, M.; Rambo, R.P.; Poole, F.L., 2nd; Tsutakawa, S.E.; Jenney, F.E., Jr.;  
642 Classen, S.; Frankel, K.A.; Hopkins, R.C., et al. Robust, high-throughput solution structural analyses by  
643 small angle X-ray scattering (SAXS). *Nat Methods* **2009**, *6*, 606-612, doi:10.1038/nmeth.1353.
- 644 35. Konarev, P.V.; Volkov, V.V.; Sokolova, A.V.; Koch, M.H.J.; Svergun, D.I. PRIMUS: a Windows PC-  
645 based system for small-angle scattering data analysis. *Journal of Applied Crystallography* **2003**, *36*, 1277-  
646 1282, doi:doi:10.1107/S0021889803012779.
- 647 36. Konarev, P.V.; Petoukhov, M.V.; Volkov, V.V.; Svergun, D.I. ATSAS 2.1, a program package for small-  
648 angle scattering data analysis. *Journal of Applied Crystallography* **2006**, *39*, 277-286,  
649 doi:doi:10.1107/S0021889806004699.
- 650 37. Svergun, D. Determination of the regularization parameter in indirect-transform methods using  
651 perceptual criteria. *Journal of Applied Crystallography* **1992**, *25*, 495-503,  
652 doi:doi:10.1107/S0021889892001663.
- 653 38. Porod, G. Chapter 2: General Theory. In *Small Angle X-ray Scattering*, Glatter, O.a.K., O. , Ed. Academic  
654 Press: London, 1982.

- 655 39. Mertens, H.D.; Svergun, D.I. Structural characterization of proteins and complexes using small-angle  
656 X-ray solution scattering. *J Struct Biol* **2010**, *172*, 128-141, doi:10.1016/j.jsb.2010.06.012.
- 657 40. Svergun, D.I.; Petoukhov, M.V.; Koch, M.H. Determination of domain structure of proteins from X-ray  
658 solution scattering. *Biophys J* **2001**, *80*, 2946-2953, doi:10.1016/S0006-3495(01)76260-1.
- 659 41. Minor, W.; Cymborowski, M.; Otwinowski, Z.; Chruszcz, M. HKL-3000: the integration of data  
660 reduction and structure solution--from diffraction images to an initial model in minutes. *Acta*  
661 *Crystallogr D Biol Crystallogr* **2006**, *62*, 859-866, doi:10.1107/s0907444906019949.
- 662 42. Bücher, T.a.P., Gerhard. Pyruvate kinase from muscle: Pyruvate phosphokinase, pyruvic  
663 phosphoferase, phosphopyruvate transphosphorylase, phosphate--transferring enzyme II, etc.  
664 Phosphoenolpyruvate + ADP  $\rightleftharpoons$  Pyruvate + ATP. *Methods in Enzymology* **1955**, *1*, 435 - 440, doi:  
665 10.1016/0076-6879(55)01071-9.
- 666 43. Slabinski, L.; Jaroszewski, L.; Rychlewski, L.; Wilson, I.A.; Lesley, S.A.; Godzik, A. XtalPred: a web  
667 server for prediction of protein crystallizability. *Bioinformatics* **2007**, *23*, 3403-3405,  
668 doi:10.1093/bioinformatics/btm477.
- 669 44. Smith, T.F.; Waterman, M.S. Identification of common molecular subsequences. *J Mol Biol* **1981**, *147*,  
670 195-197, doi:10.1016/0022-2836(81)90087-5.
- 671 45. Laemmli, U.K. Cleavage of Structural Proteins during the Assembly of the Head of Bacteriophage T4.  
672 *Nature* **1970**, *227*, 680-685, doi:10.1038/227680a0.
- 673 46. Lee, J.C.; Timasheff, S.N. Partial specific volumes and interactions with solvent components of proteins  
674 in guanidine hydrochloride. *Biochemistry* **1974**, *13*, 257-265, doi:10.1021/bi00699a005.
- 675 47. Volkov, V.V.; Svergun, D.I. Uniqueness of ab initio shape determination in small-angle scattering.  
676 *Journal of Applied Crystallography* **2003**, *36*, 860-864, doi:doi:10.1107/S0021889803000268.
- 677 48. Putnam, C.D.; Hammel, M.; Hura, G.L.; Tainer, J.A. X-ray solution scattering (SAXS) combined with  
678 crystallography and computation: defining accurate macromolecular structures, conformations and  
679 assemblies in solution. *Q Rev Biophys* **2007**, *40*, 191-285, doi:10.1017/S0033583507004635.
- 680
